# Supplementary material for: Vanadium-doped molybdenum carbides as a promising catalyst for C–N/C–C coupling reactions
Source: Royal Society of Chemistry journal article supplement (doi:10.1039/d0nj01593h), 2020-01-01
Supplement: d0nj01593h1.pdf [file d0nj01593h1.pdf]

## *Supporting Information*

### **Vanadium-doped Molybdenum Carbides as Promising Catalyst for C-N/C-C coupling reactions**

*Chen Zhang<sup>1</sup>, Siduo Wu<sup>1</sup>, Shaochuan Luo<sup>1</sup>, Yong Wang<sup>\*1</sup>, Jingjing Li,<sup>2</sup> Yan Leng,<sup>2</sup>*

*<sup>1</sup> Guangdong Provincial Key Laboratory of Nano-Micro Material Research center,  
School of Chemical Biology & Biotechnology, Peking University Shenzhen Graduate  
School, Shenzhen 518055, China*

*<sup>2</sup> School of Chemical and Material Engineering, Jiangnan University, Jiangsu,  
214122, China.*

*\* Corresponding author. E-mail: ywang@pkusz.edu.cn*

#### **I. Materials and methods**

All the reactions reacted in the air. All the obtained products were characterized <sup>1</sup>H NMR spectra and <sup>13</sup>C NMR spectra. NMR spectra were obtained on Varian 400 MHz spectrometers; TLC was performed using commercially prepared 200-300 mesh silica gel plates; All the reagents were purchased from commercial sources (Energy Chemical, TCI, J&K Chemic, Meryer Chemic), and used without further purification. FT-IR spectra were recorded on a Nicolet 360 FT-IR instrument (KBr discs) in the 4000–400 cm<sup>-1</sup> region. TG analysis was carried out using a STA409 instrument in dry air at a heating rate of 25 °C/min from 25 to 900 °C. SEM was performed on a HITACHI S-4800 field-emission scanning electron microscope. TEM was obtained using a JEOL JEM-2100 microscope operated at 200 kV. XRD patterns were collected on a Bruker D8 Advance powder diffractometer, using a Ni-filtered Cu/K $\alpha$  radiation source at 40 kV and 20 mA, from 3° to 80° with a scan rate of 4°/min. The specific surface areas were evaluated using the Brunauer–Emmett–Teller (BET) method and the pore distribution was calculated by the BJH method from adsorption branches of isotherms.

## II. Catalysts and Compounds Characterization

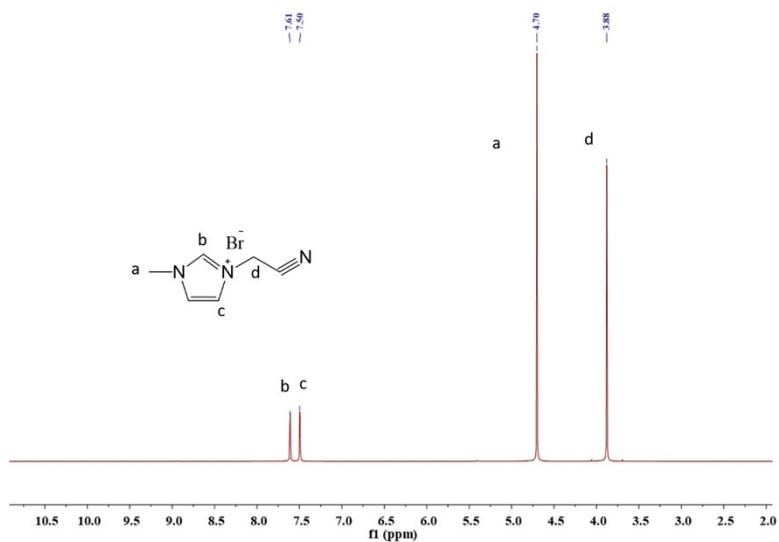

**Figure S1.**  $^1\text{H}$  NMR spectrum of [CMim]Br.

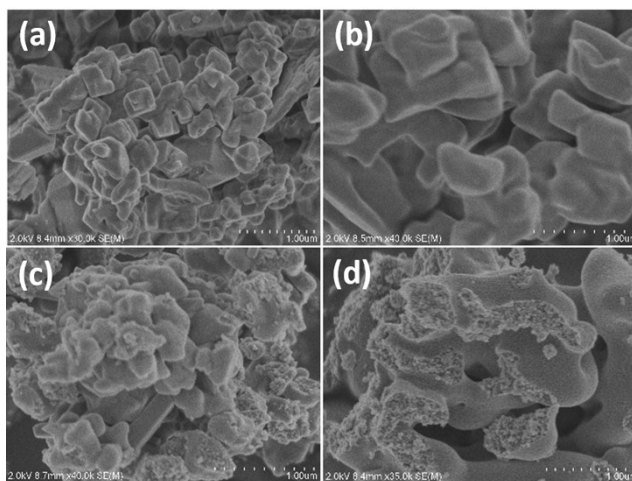

**Figure S2.** SEM images of (a) PMoV-CMim, (b) V-Mo<sub>2</sub>C@NC<sub>450</sub>, (c) V-Mo<sub>2</sub>C@NC<sub>600</sub>, and (d) V-Mo<sub>2</sub>C@NC<sub>800</sub>.

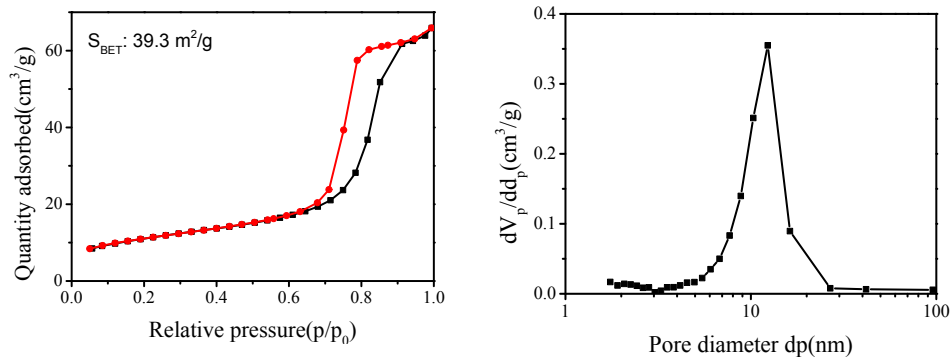

**Figure S3.** (A) N<sub>2</sub> sorption analysis and (B) the corresponding pore size distribution of Mo<sub>2</sub>C@NC<sub>800</sub>.

**Table S1.** Porous features of different samples.

| Entry | Sample                                | BET<br>(m <sup>2</sup> /g) | Pore size (nm) | Pore volume (m <sup>3</sup> ) |
|-------|---------------------------------------|----------------------------|----------------|-------------------------------|
| 1     | PMoV-CMim                             | 2.9                        | —              | 0.004                         |
| 2     | V-Mo <sub>2</sub> C@NC <sub>450</sub> | 2.5                        | —              | 0.004                         |
| 3     | V-Mo <sub>2</sub> C@NC<br>600         | 27.1                       | 3.2            | 0.022                         |
| 4     | V-Mo <sub>2</sub> C@NC<br>800         | 43.3                       | 6.8            | 0.074                         |

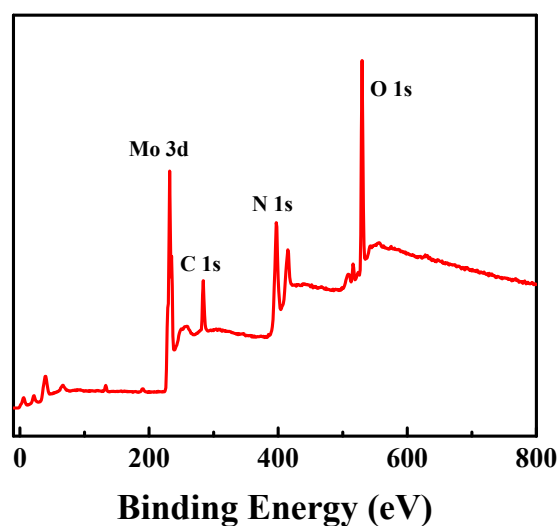

**Figure S4.** XPS survey spectrum of V-Mo<sub>2</sub>C@NC<sub>800</sub>.

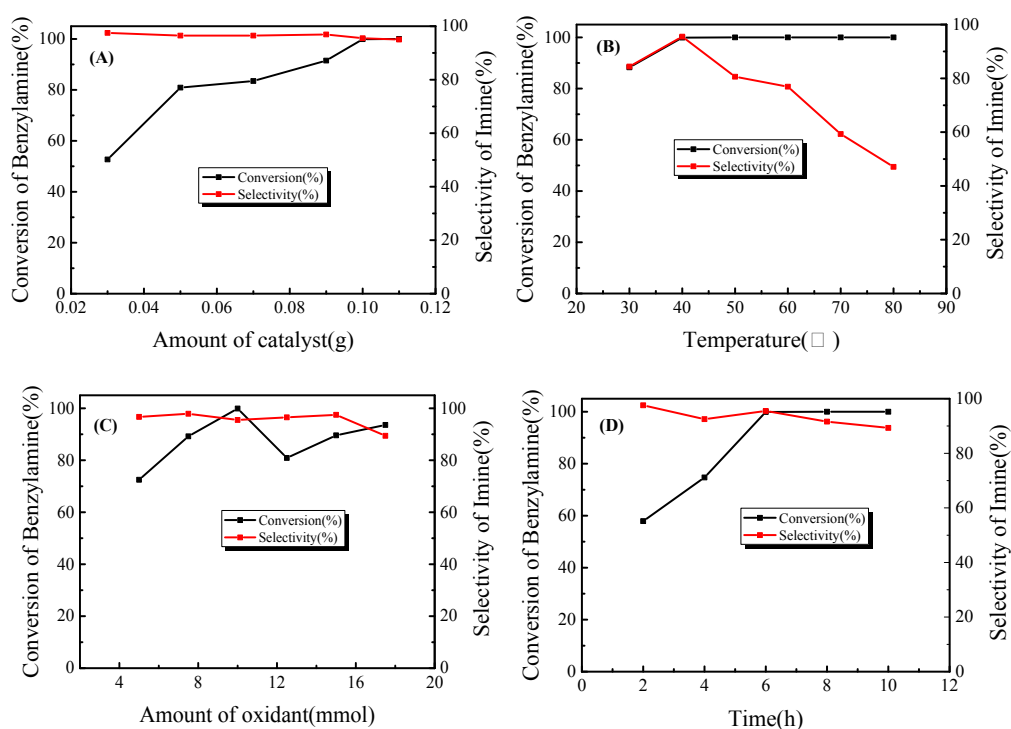

**Figure S5.** Effect of (A) Amount of catalyst, (B) Temperature, (C) Amount of oxidant and (D) Time on the conversion and selectivity of the oxidative coupling of benzylamine over V-Mo<sub>2</sub>C@NC<sub>800</sub>.

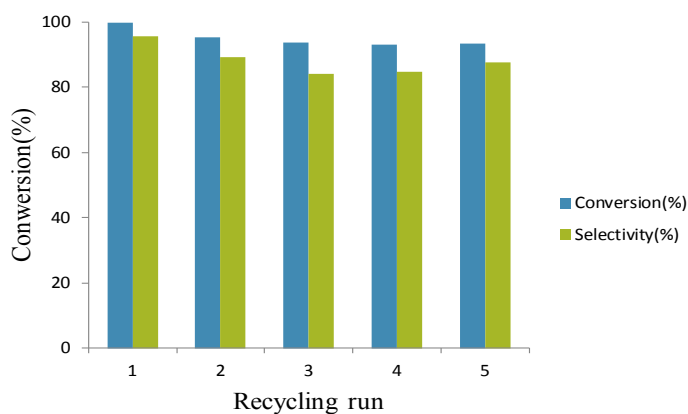

**Figure S6.** Catalytic reusability of V-Mo<sub>2</sub>C@NC<sub>800</sub> for coupling of benzylamine.

**Table S2.** Screening of reaction conditions <sup>a</sup>

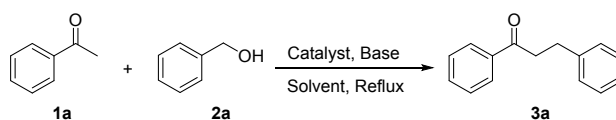

| Entry | Base                            | Solvent          | Yield [%] <sup>b</sup> |
|-------|---------------------------------|------------------|------------------------|
| 1     | NaOH                            | Toluene          | 85                     |
| 2     | Na <sub>2</sub> CO <sub>3</sub> | Toluene          | 65                     |
| 3     | Cs <sub>2</sub> CO <sub>3</sub> | Toluene          | 69                     |
| 4     | KOtBu                           | Toluene          | 72                     |
| 5     | NaOH                            | DCM              | < 5                    |
| 6     | NaOH                            | THF              | 34                     |
| 7     | NaOH                            | H <sub>2</sub> O | < 5                    |
| 8     | NaOH                            | Xylene           | 76                     |

<sup>a</sup>Reagents and conditions: **1a** (1.0 mmol), **2a** (1.2 mmol), V-Mo<sub>2</sub>C@NC<sub>800</sub> (0.01 g), base (1.0 mmol), solvent (3 mL), 110 °C or reflux, 15 h, under air. <sup>b</sup> Isolated yields based on **1a**.

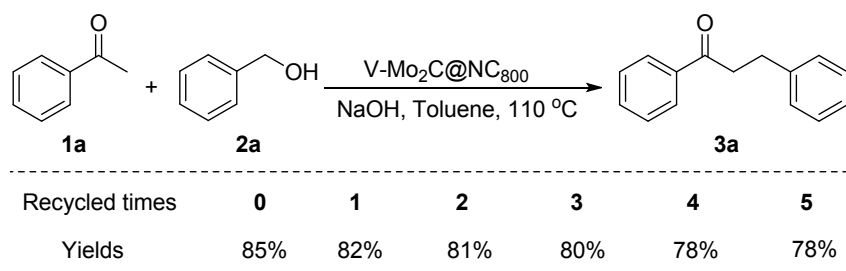

**Scheme 1.** Recycled experiments.

### III. $^1\text{H}$ NMR and $^{13}\text{C}$ NMR Spectra

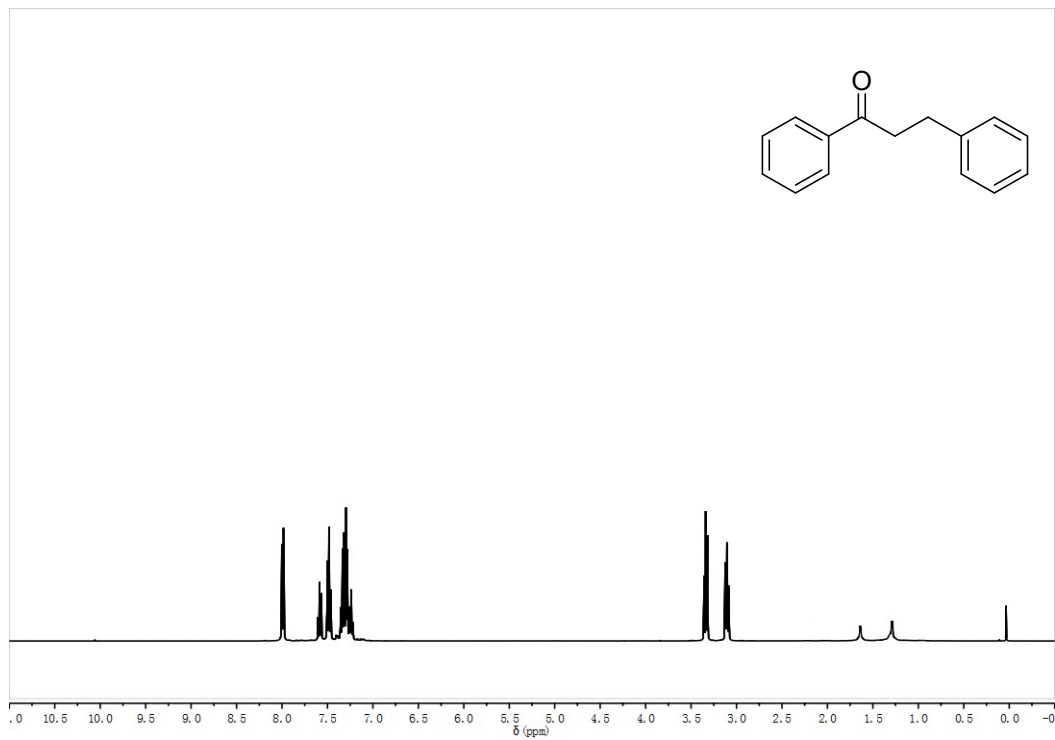

$^1\text{H}$  NMR for **3a**

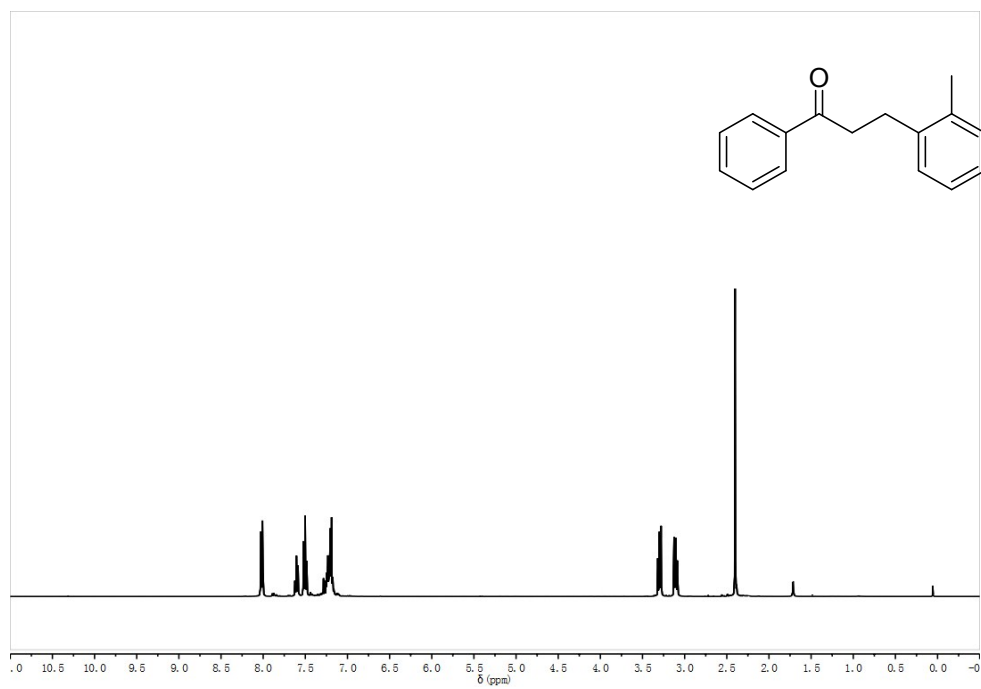

$^1\text{H}$  NMR for **3b**

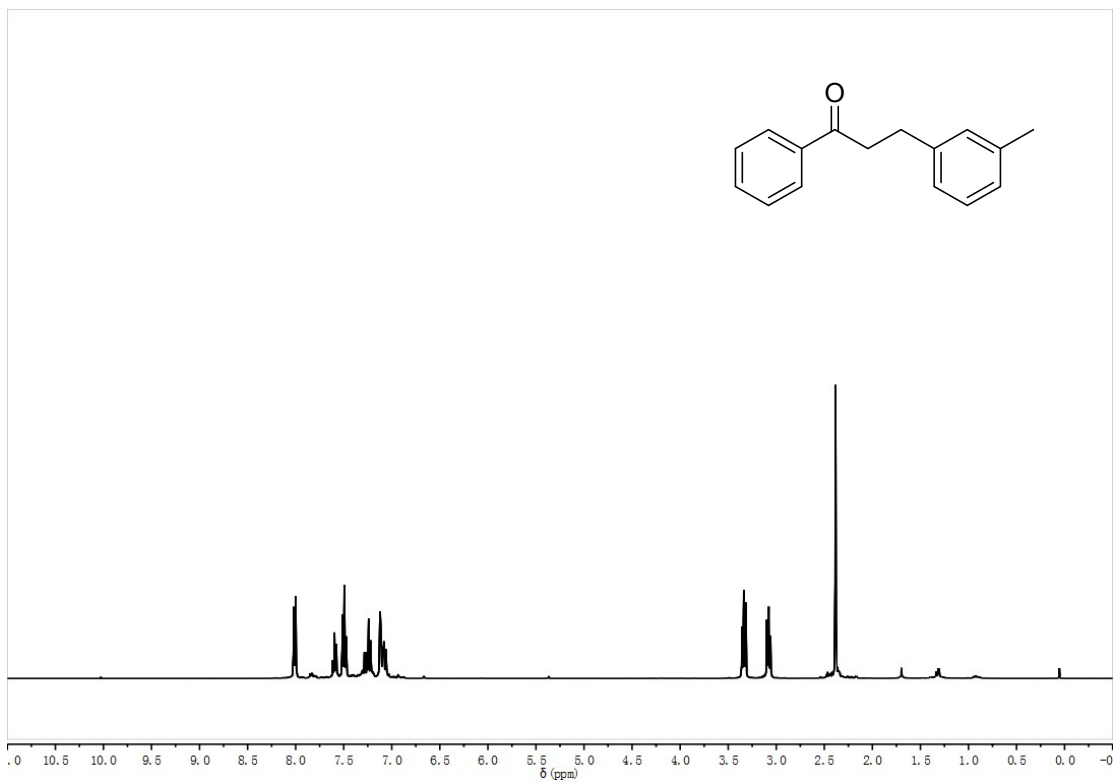

<sup>1</sup>H NMR for **3c**

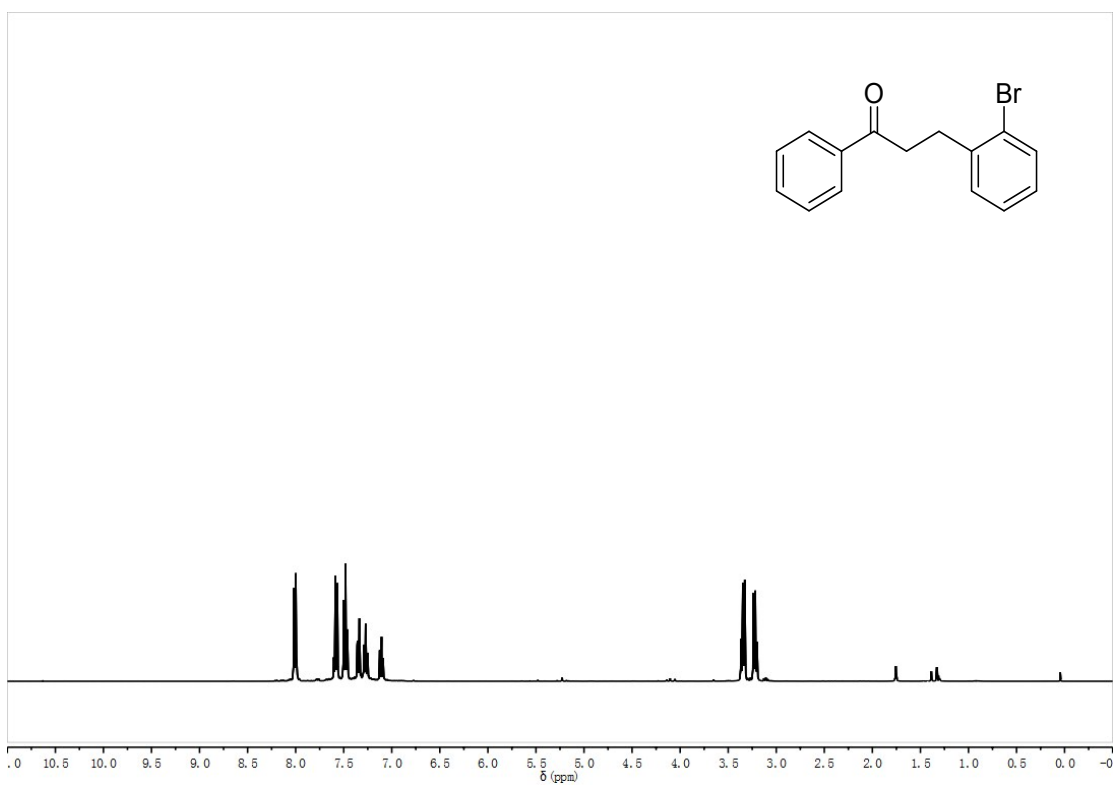

<sup>1</sup>H NMR for **3d**



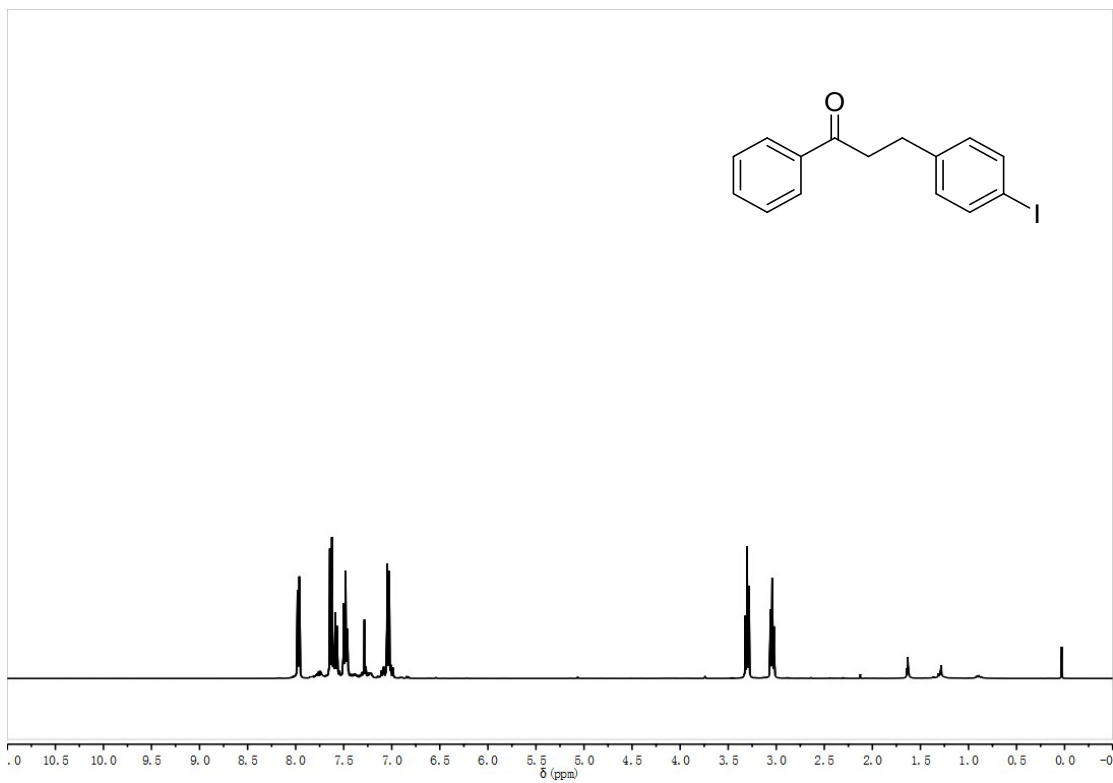

<sup>1</sup>H NMR for **3e**

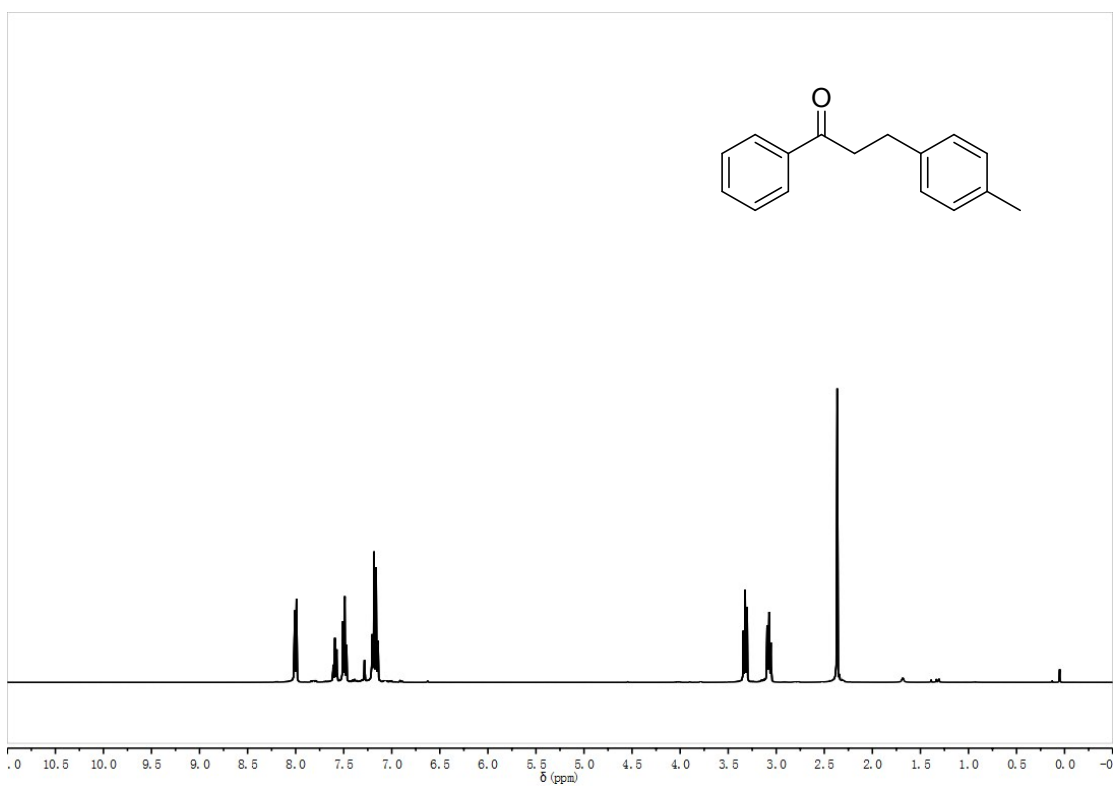

<sup>1</sup>H NMR for **3f**

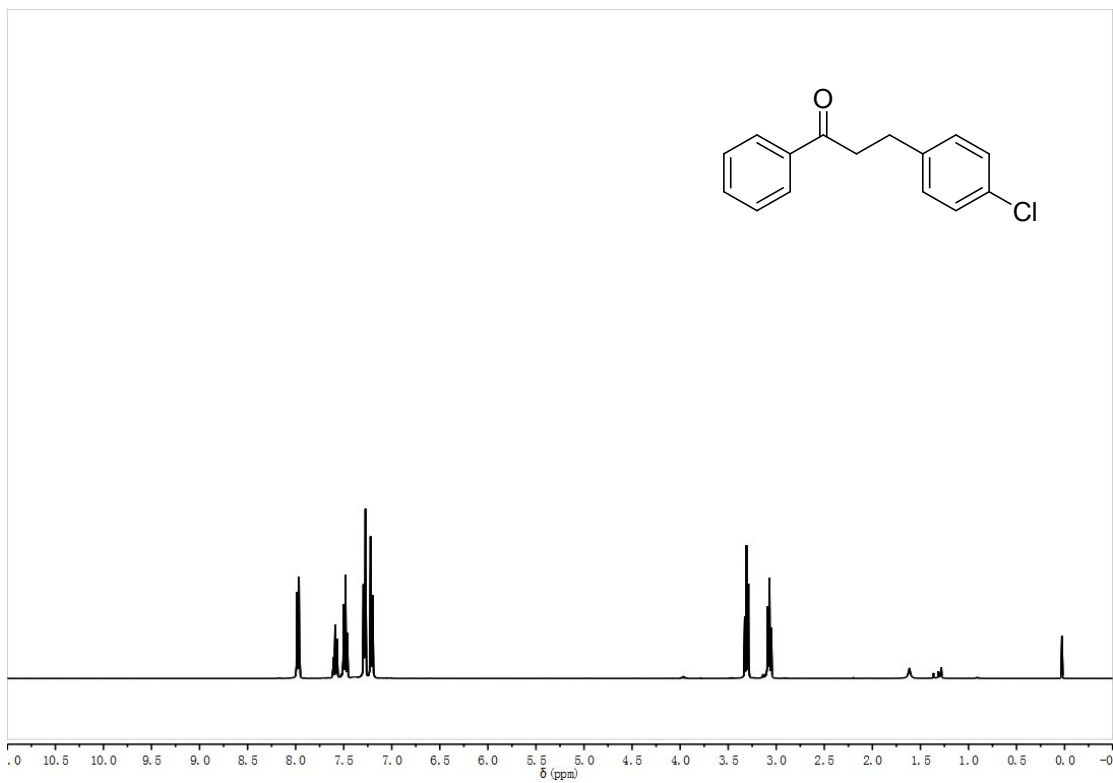

<sup>1</sup>H NMR for **3g**

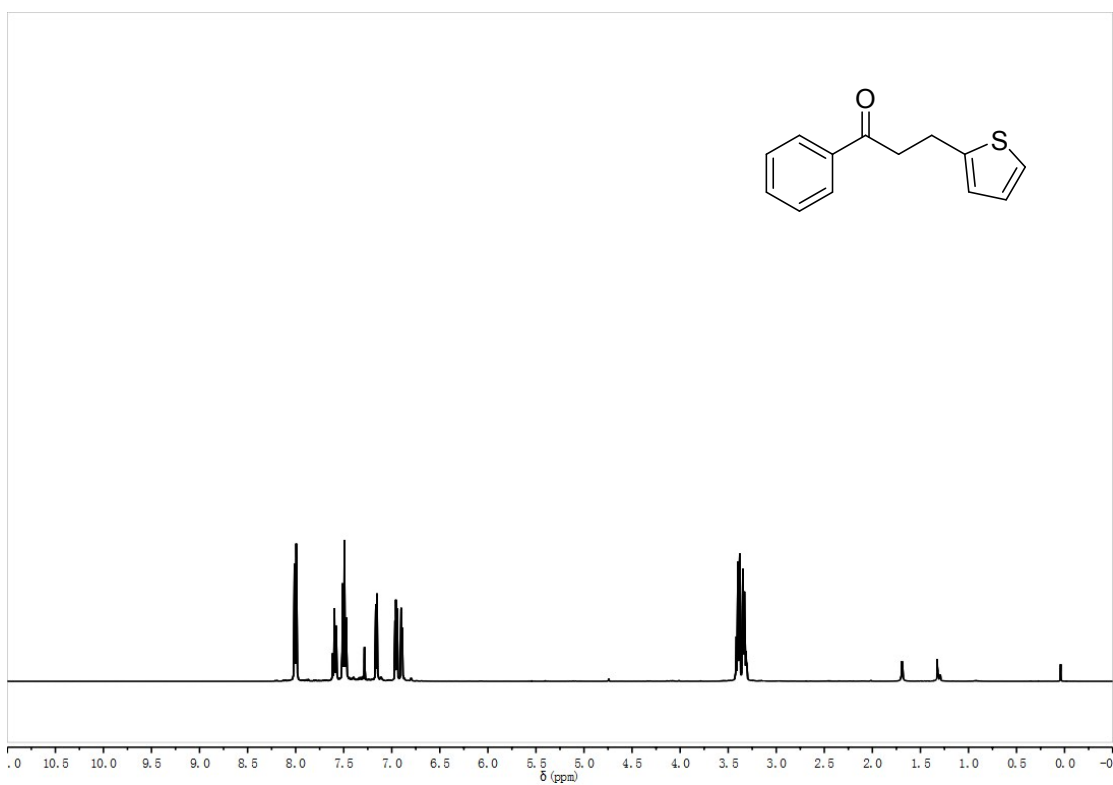

<sup>1</sup>H NMR for **3h**

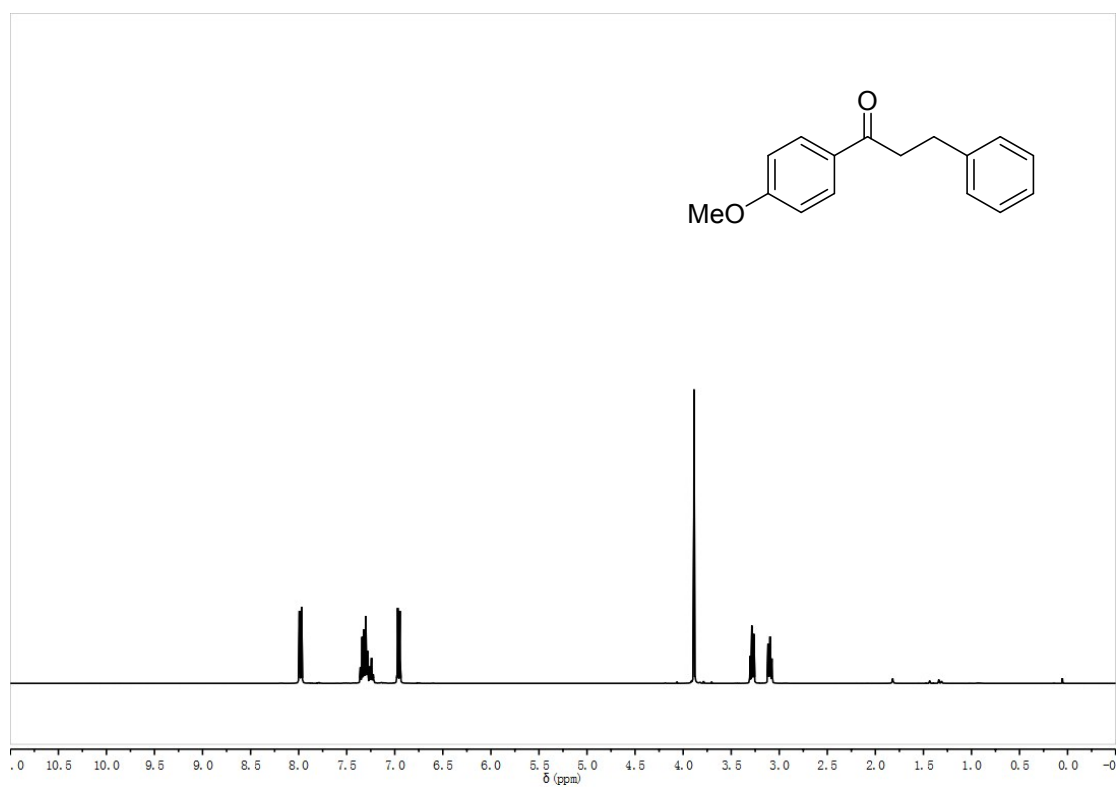

$^1\text{H}$  NMR for **3i**
